# Supplementary material for: Endothelial α5 and αv integrins cooperate in remodeling of the vasculature during development
Source: Oxford University Press journal article supplement (doi:10.1242/dev.049551), 2010-06-22
Supplement: dev049551tables1.pdf [file dev049551tables1.pdf]

**Table S1. Genotypes of progeny from  $\alpha 5^{\text{flox/flox}}$   $\times$   $\alpha 5^{+/-}$ ; *Tie2-Cre/+* crosses at weaning**

| Stage | $\alpha 5^{\text{flox/+}}$ | $\alpha 5^{\text{flox/+}}$ ; <i>Tie2-Cre</i> | $\alpha 5^{\text{flox/-}}$ | $\alpha 5^{\text{flox/-}}$ ; <i>Tie2-Cre</i> |
|-------|----------------------------|----------------------------------------------|----------------------------|----------------------------------------------|
| ~ P21 | 133 (28%)                  | 125 (26%)                                    | 113 (24%)                  | 102 (22%)                                    |

$\chi^2$  test;  $P=0.3$ ; no significant divergence from Mendelian ratios.
