# Supplementary material for: Endothelial α5 and αv integrins cooperate in remodeling of the vasculature during development
Source: Oxford University Press journal article supplement (doi:10.1242/dev.049551), 2010-06-22
Supplement: dev049551tables2.pdf [file dev049551tables2.pdf]

**Table S2. Overview of cardiovascular defects observed in serially sectioned E14.5 embryos**

| Genotype                                                  | Great artery connections                                        | VSD         | RERSA       | Aortic arch defects       |
|-----------------------------------------------------------|-----------------------------------------------------------------|-------------|-------------|---------------------------|
| <i>α5<sup>flox/+</sup>; αv<sup>flox/+</sup>; Tie2-Cre</i> |                                                                 |             |             |                           |
| 1198-10                                                   | Normal                                                          | Closed      | Absent      | None                      |
| <b>α5/αv-cdHemi</b>                                       | <b>1/1 normal</b>                                               | <b>None</b> | <b>None</b> | <b>None</b>               |
| <i>α5<sup>flox/-</sup>; αv<sup>flox/-</sup>; Tie2-Cre</i> |                                                                 |             |             |                           |
| 1198-3                                                    | Defective                                                       | VSD         | RERSA       | Tiny AAo                  |
| 1198-4                                                    | Defective                                                       | VSD         | Absent      | IAA-C                     |
| 1198-9                                                    | Defective                                                       | VSD         | RERSA       | Very thin AA at AA-C      |
| 1199-2                                                    | Fragile                                                         | VSD         | Absent      | Thin AA                   |
| 1261-1                                                    | Defective                                                       | VSD         | RERSA       | AAo missing               |
| 1261-4                                                    | Defective                                                       | VSD         | RERSA       | IAA-C (or B)              |
| <b>α5/αv-cdKO</b>                                         | <b>5/6 defective</b><br><b>1/6 fragile</b>                      | <b>6/6</b>  | <b>4/6</b>  | <b>Frequent defects</b>   |
| <i>α5<sup>flox/-</sup>; αv<sup>flox/+</sup>; Tie2-Cre</i> |                                                                 |             |             |                           |
| 1198-1                                                    | Normal                                                          | VSD         | Absent      | Thin at AA-C region       |
| 1198-6                                                    | Normal                                                          | Small VSD   | Absent      | Thin AA                   |
| 1198-8                                                    | Defective                                                       | VSD         | RERSA       | Vascular ring (double DA) |
| 1198-11                                                   | Normal                                                          | VSD         | Absent      | Long thin AA              |
| 1199-1                                                    | Normal                                                          | VSD         | Absent      | AA dilated shape          |
| 1261-7                                                    | Fragile                                                         | VSD         | Absent      | Stenosis of DAo           |
| 1261-3                                                    | Fragile                                                         | VSD         | Absent      | Thin AA                   |
| <b>α5-cKO; αv-cHemi</b>                                   | <b>1/7 defective</b><br><b>2/7 fragile</b><br><b>4/7 normal</b> | <b>7/7</b>  | <b>1/7</b>  | <b>Occasional defects</b> |
| <i>α5<sup>flox/+</sup>; αv<sup>flox/-</sup>; Tie2-Cre</i> |                                                                 |             |             |                           |
| 1198-2                                                    | Normal                                                          | Closed      | Absent      | Absent                    |
| 1261-5                                                    | Normal                                                          | Closed      | Absent      | Absent                    |
| <b>α5-cHemi; αv-cKO</b>                                   | <b>2/2 normal</b>                                               | <b>0/2</b>  | <b>0/2</b>  | <b>None</b>               |

Embryos are organized by genotype and litter embryo number. Great-artery connections: normal, appears as control; fragile, some parts of vessels look distorted or thin but all the connections are normal; defective, defects in vessel organization. VSD column: VSD, ventricular septation defect; closed, ventricular septation; RERSA, retro-oesophageal right subclavian artery. Aortic arch (AA) column, description of defects: A Ao, ascending aorta; (I)AA-B/C, interrupted aortic arch type (see Fig. 3A).
