# Supplementary material for: Endothelial α5 and αv integrins cooperate in remodeling of the vasculature during development
Source: Oxford University Press journal article supplement (doi:10.1242/dev.049551), 2010-06-22
Supplement: dev049551tables3.pdf [file dev049551tables3.pdf]

### Table S3. Genotypes of progeny from $\alpha 5^{\text{flox/flox}}$ $\times$ $\alpha 5^{\text{flox/+}}$ *Tie2-Cre* crosses at weaning

| $\alpha 5^{\text{flox/+}}$ | $\alpha 5^{\text{flox/+}}$ ; <i>Tie2-Cre</i> | $\alpha 5^{\text{flox/flox}}$ | $\alpha 5^{\text{flox/flox}}$ ; <i>Tie2-Cre</i> |
|----------------------------|----------------------------------------------|-------------------------------|-------------------------------------------------|
| 32 (29%)                   | 33 (30%)                                     | 29 (27%)                      | 15* (14%)                                       |

\* $\chi^2$  test;  $P=0.05$ ; marginally significant divergence from Mendelian ratios.
