# Supplementary figures and images for: Endothelial α5 and αv integrins cooperate in remodeling of the vasculature during development
Source: Oxford University Press journal article supplement (doi:10.1242/dev.049551), 2010-06-22

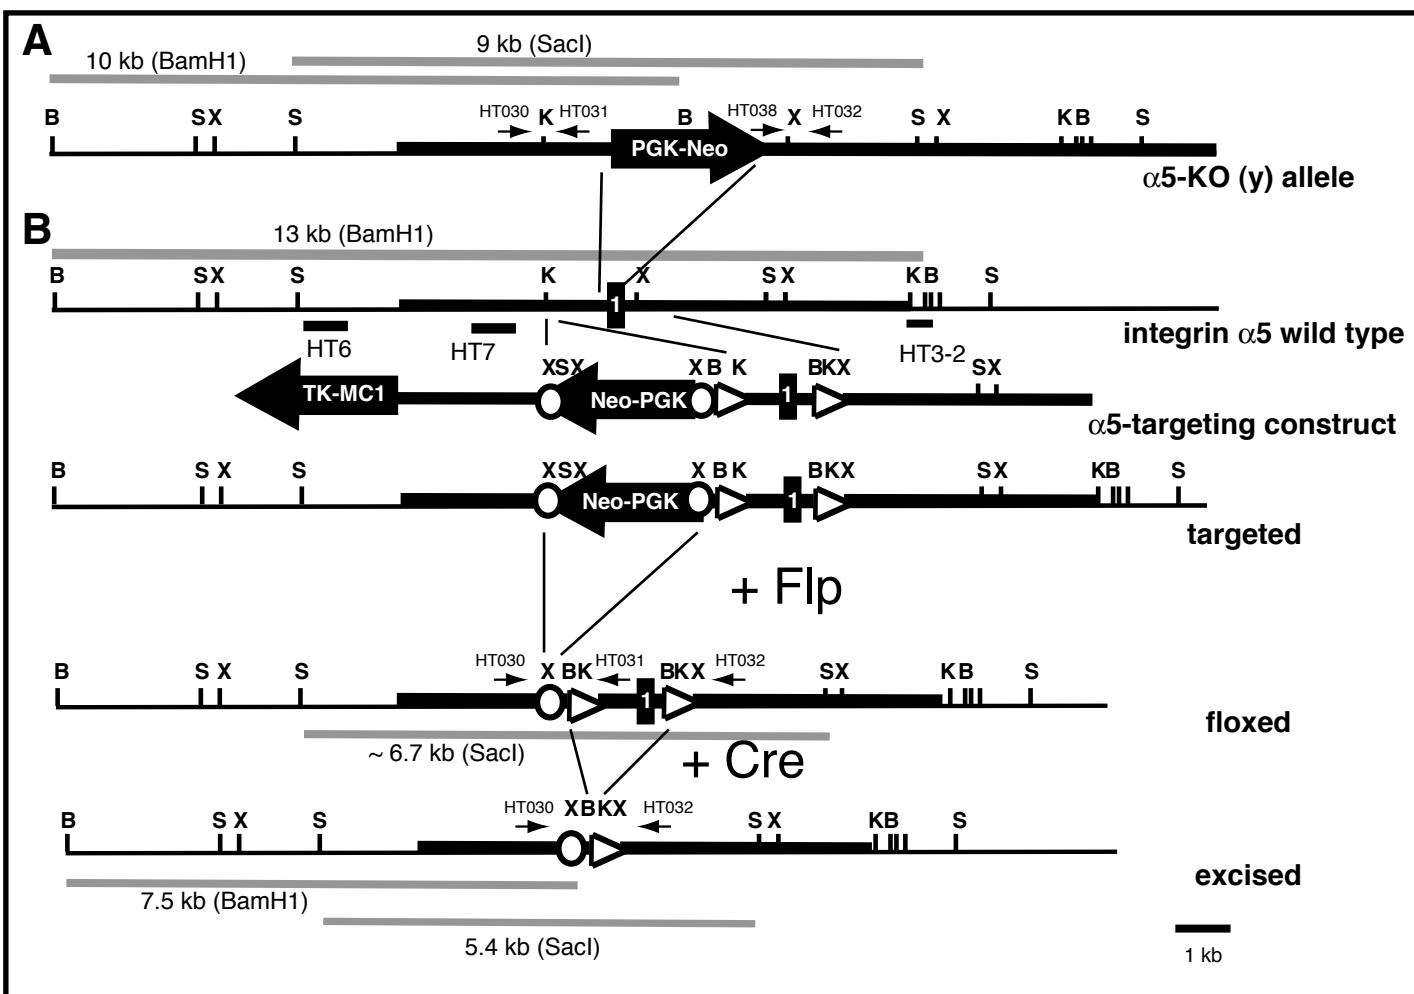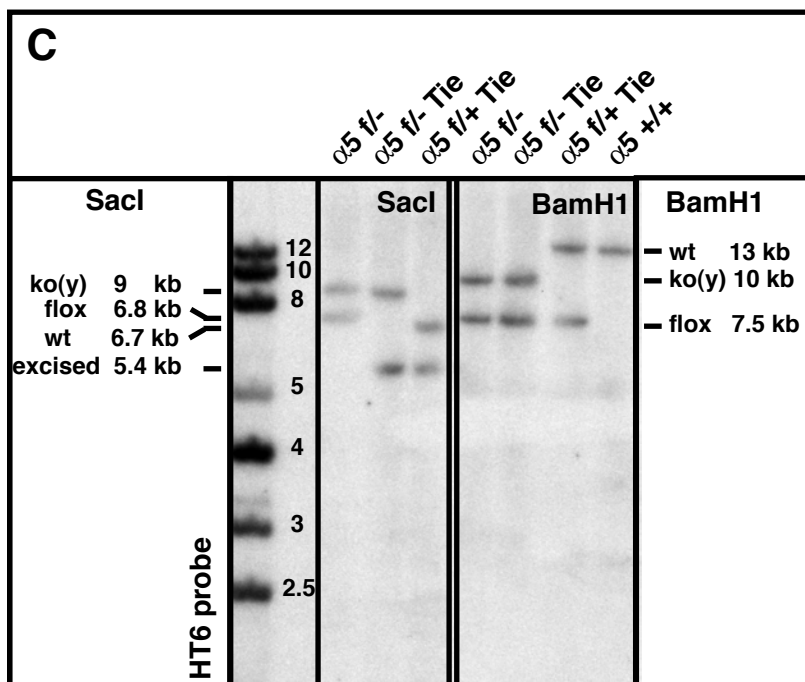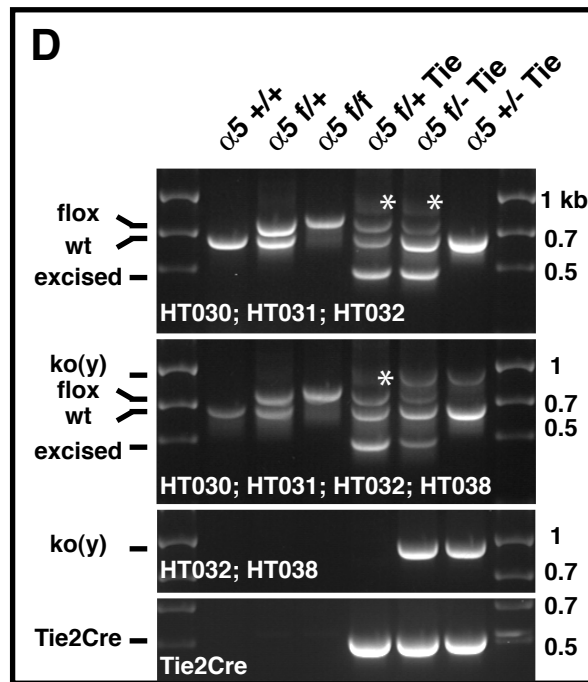

Supplement: dev049551-sup-049551figs1.pdf [file dev049551-sup-049551figs1.pdf]

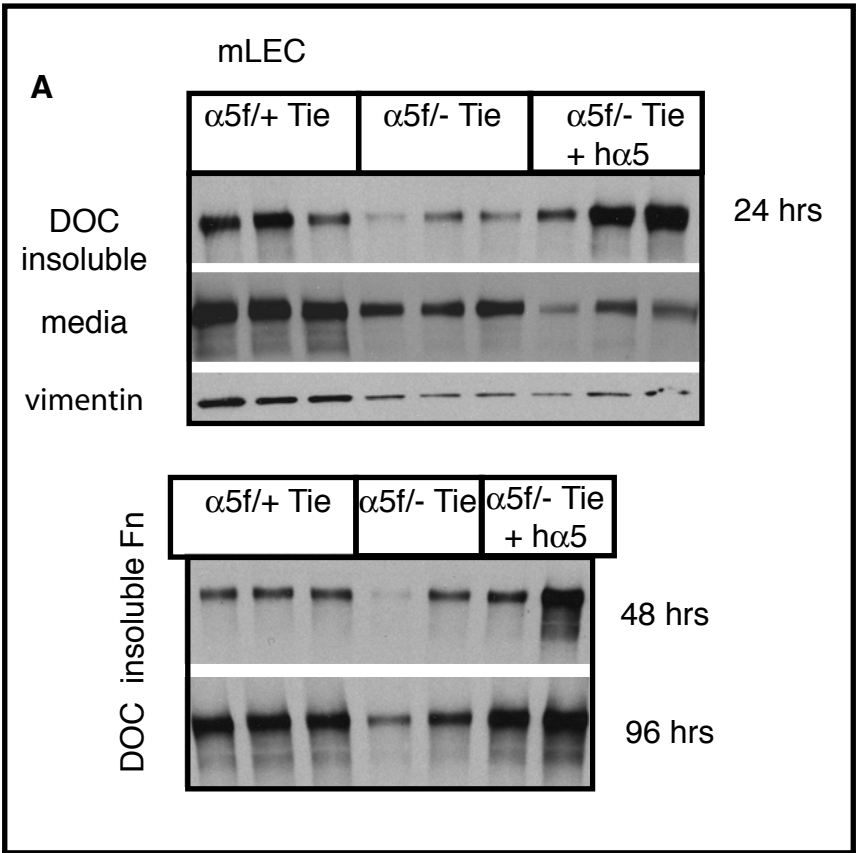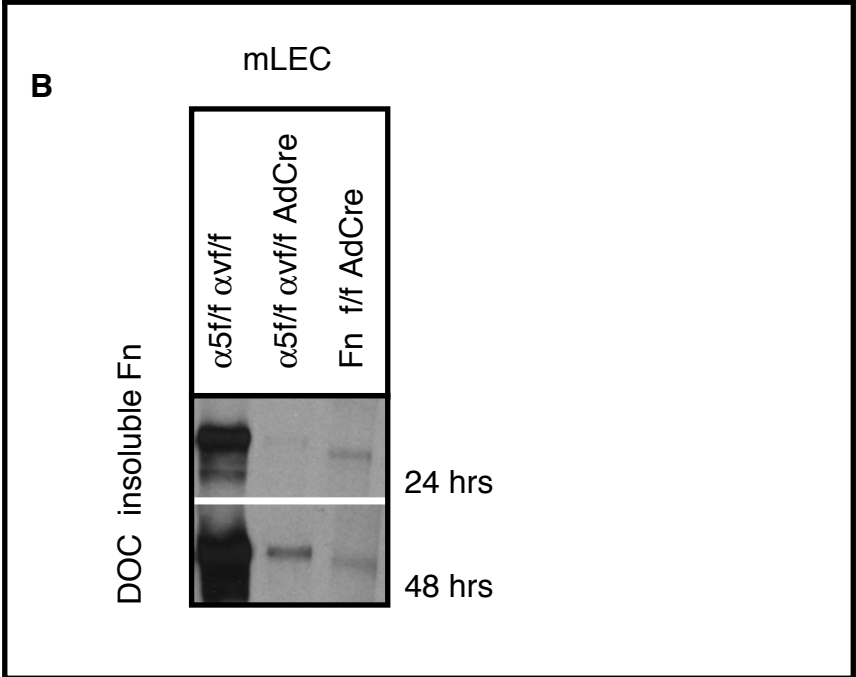

Supplement: dev049551-sup-049551figs10.pdf [file dev049551-sup-049551figs10.pdf]

**A**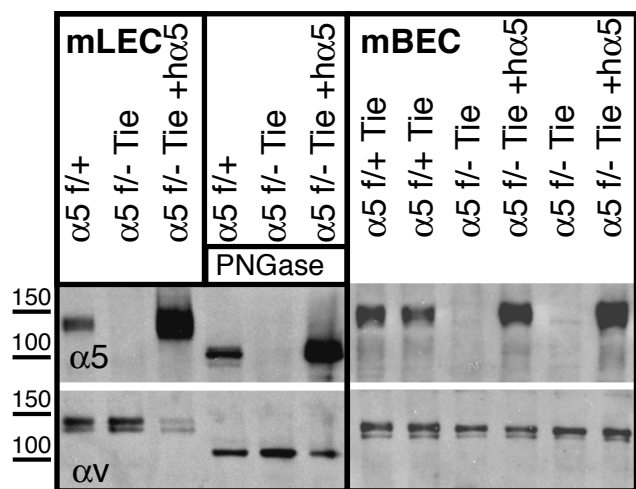**B**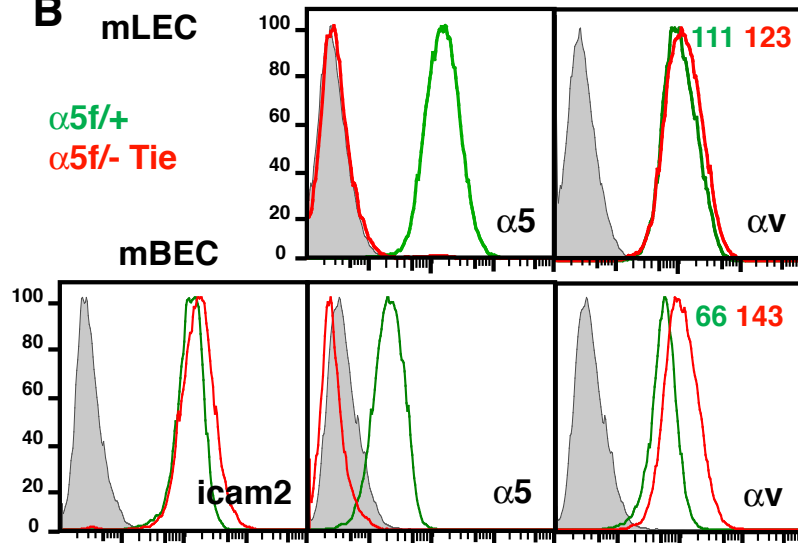**C**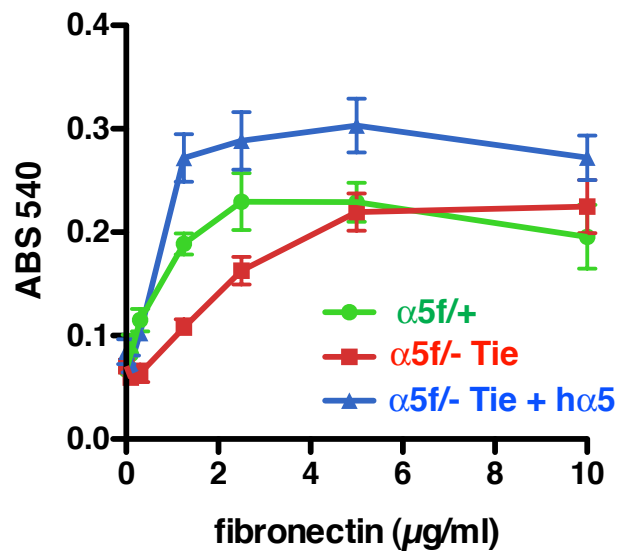

Supplement: dev049551-sup-049551figs2.pdf [file dev049551-sup-049551figs2.pdf]

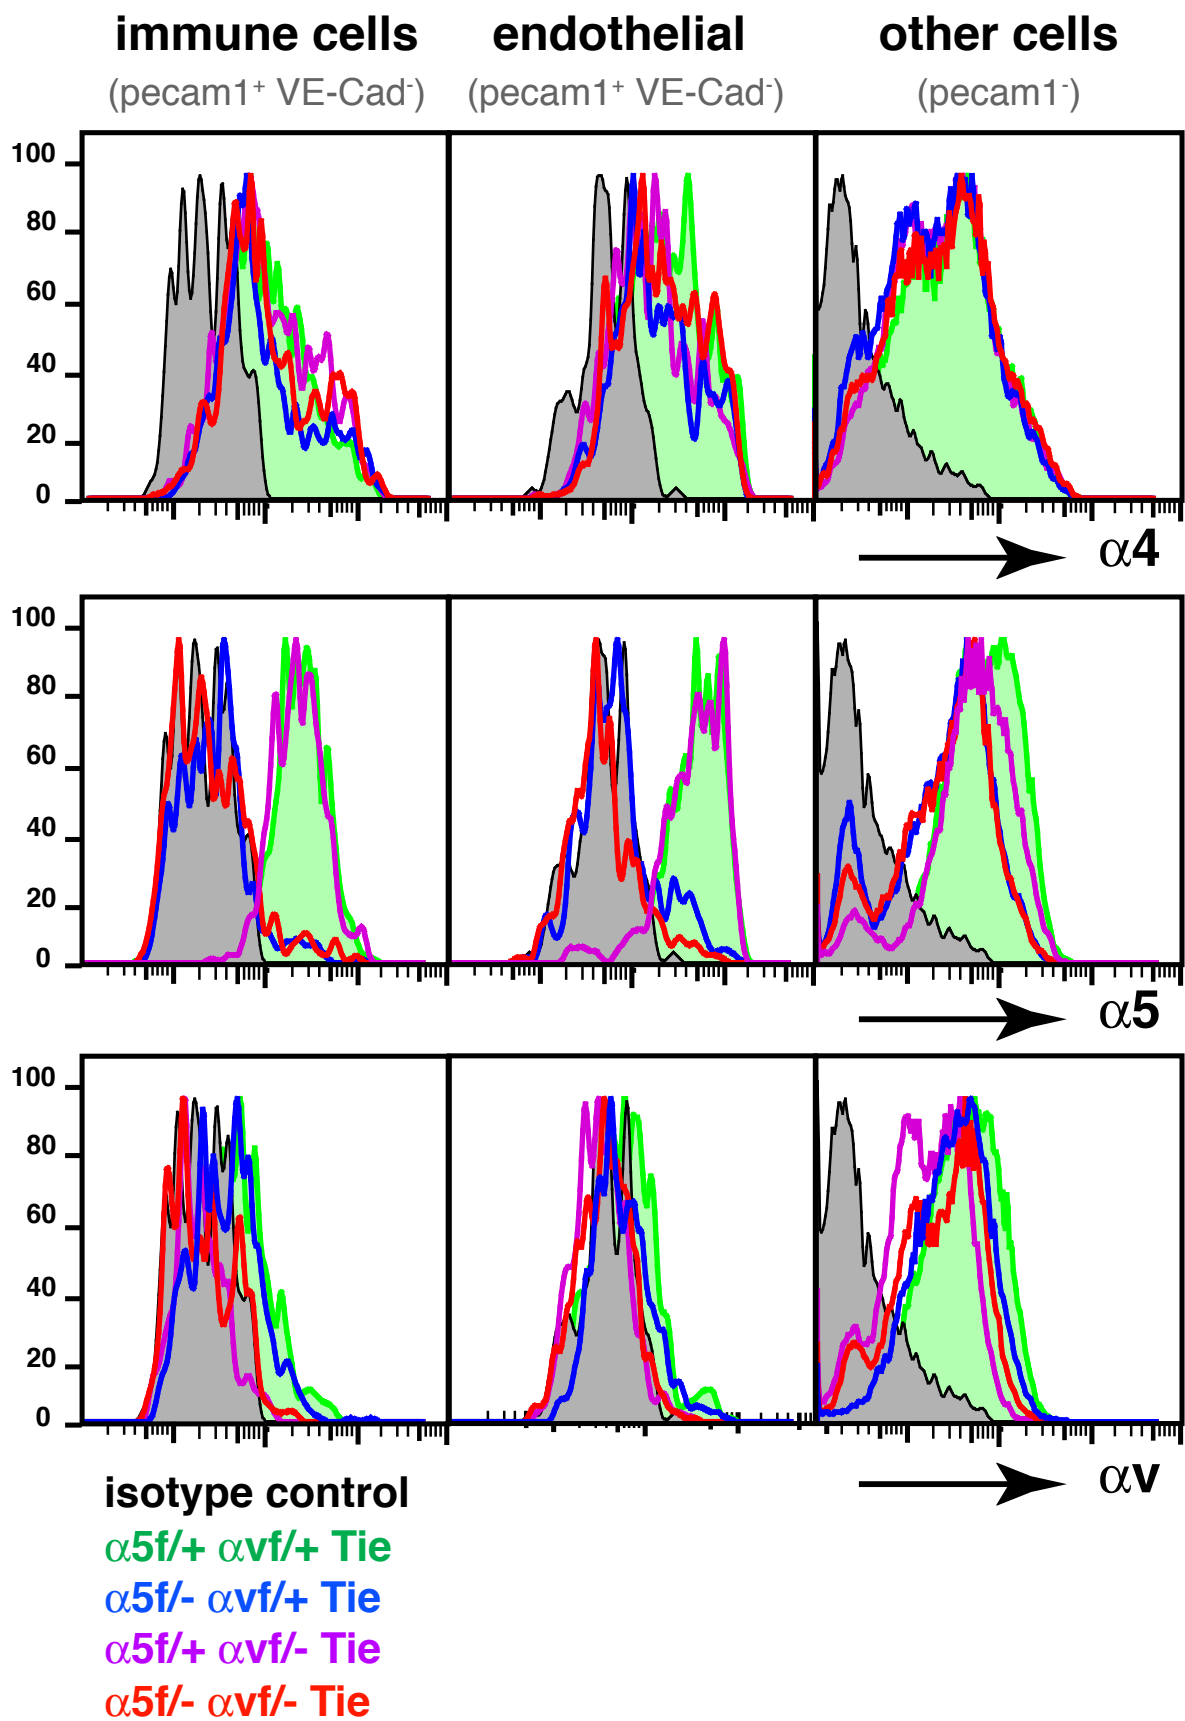

Supplement: dev049551-sup-049551figs4.pdf [file dev049551-sup-049551figs4.pdf]

$\alpha 5f/+ \alpha vf/+$  Tie

$\alpha 5f/- \alpha vf/-$  Tie

$\alpha 5f/+ \alpha vf/+$  Tie

$\alpha 5f/- \alpha vf/-$  Tie

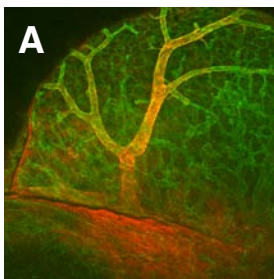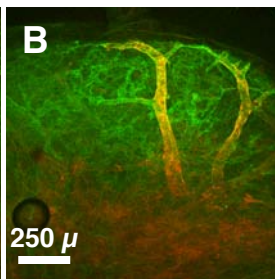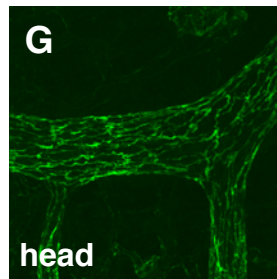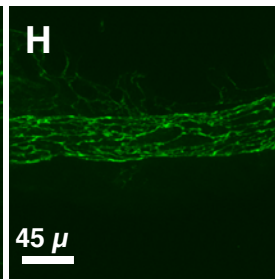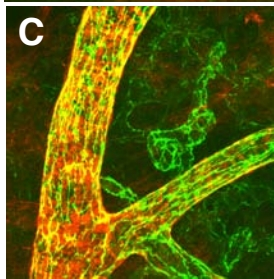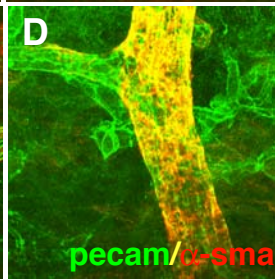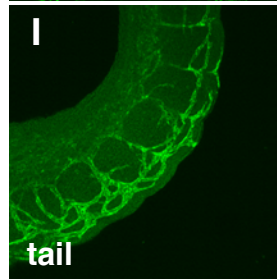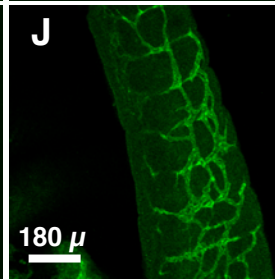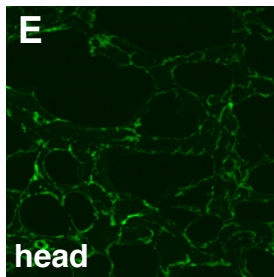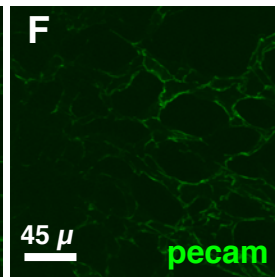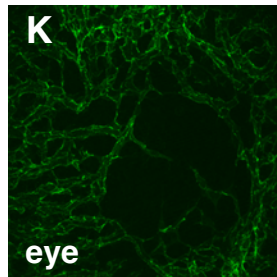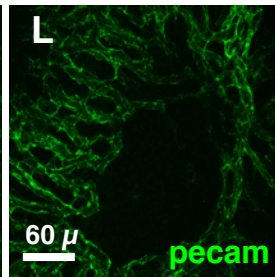

Supplement: dev049551-sup-049551figs5.pdf [file dev049551-sup-049551figs5.pdf]

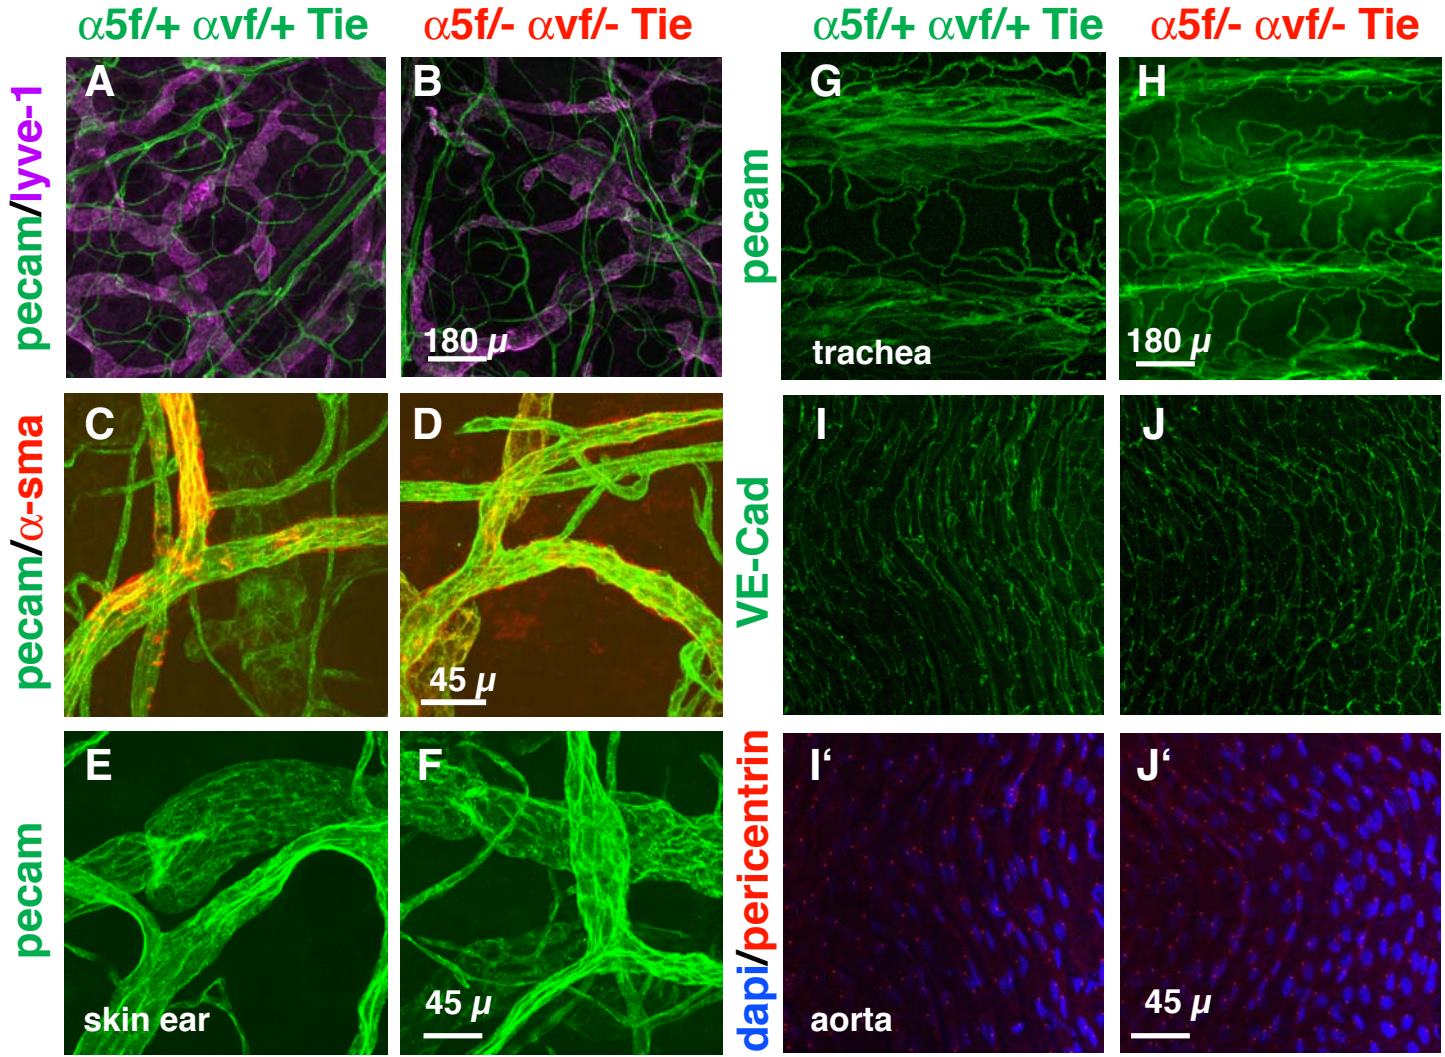

Supplement: dev049551-sup-049551figs6.pdf [file dev049551-sup-049551figs6.pdf]

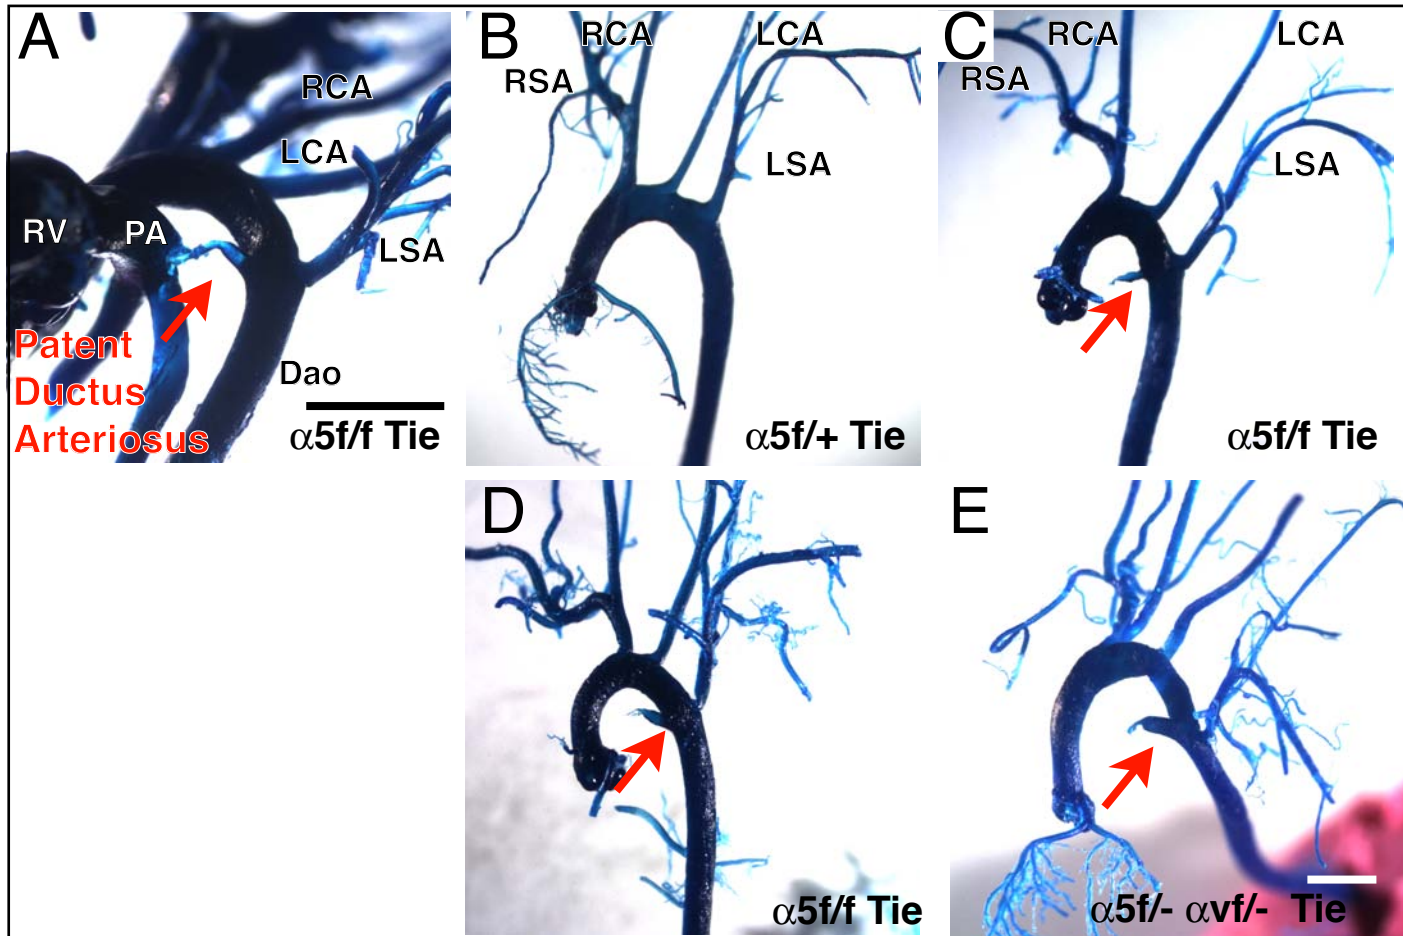

Supplement: dev049551-sup-049551figs7.pdf [file dev049551-sup-049551figs7.pdf]

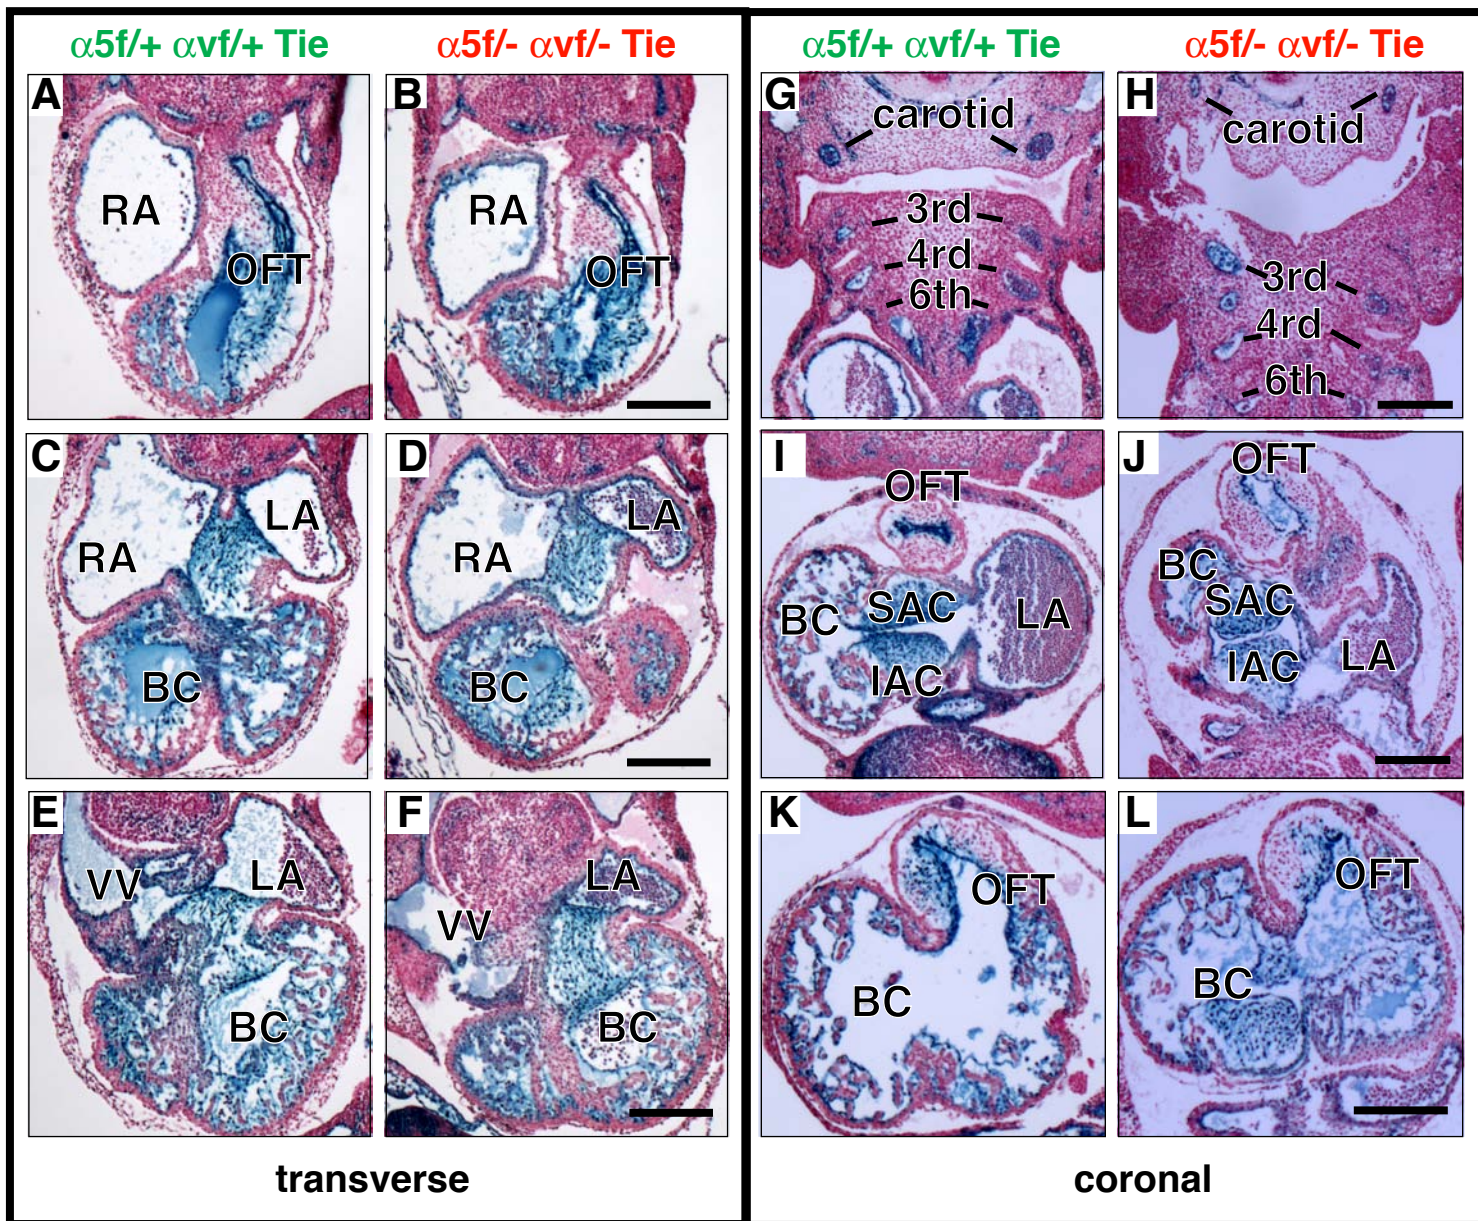

Supplement: dev049551-sup-049551figs8.pdf [file dev049551-sup-049551figs8.pdf]

**A**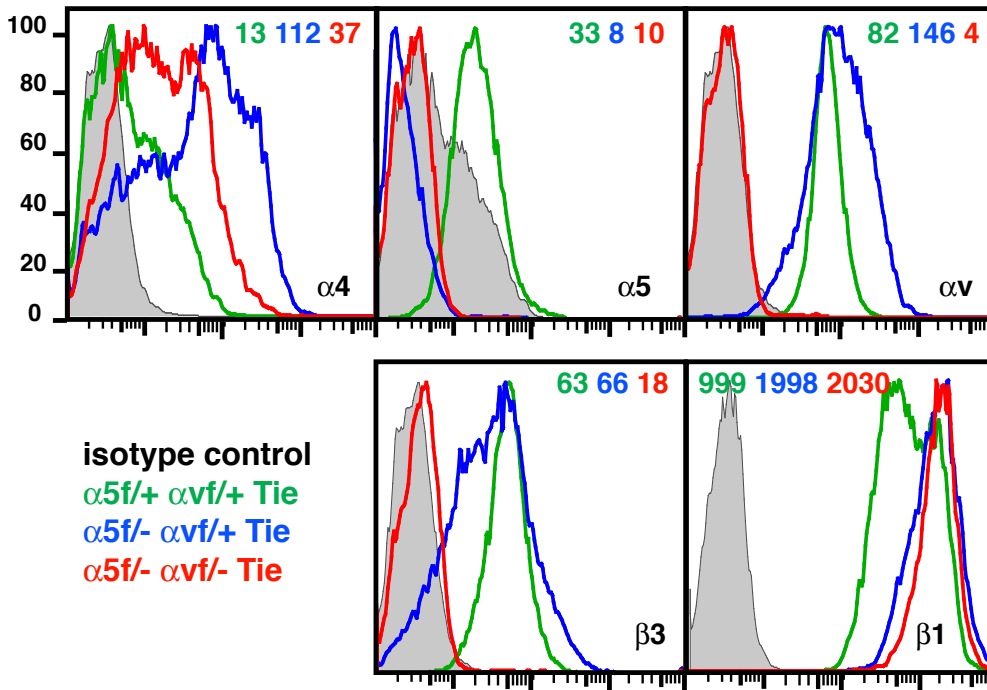**B**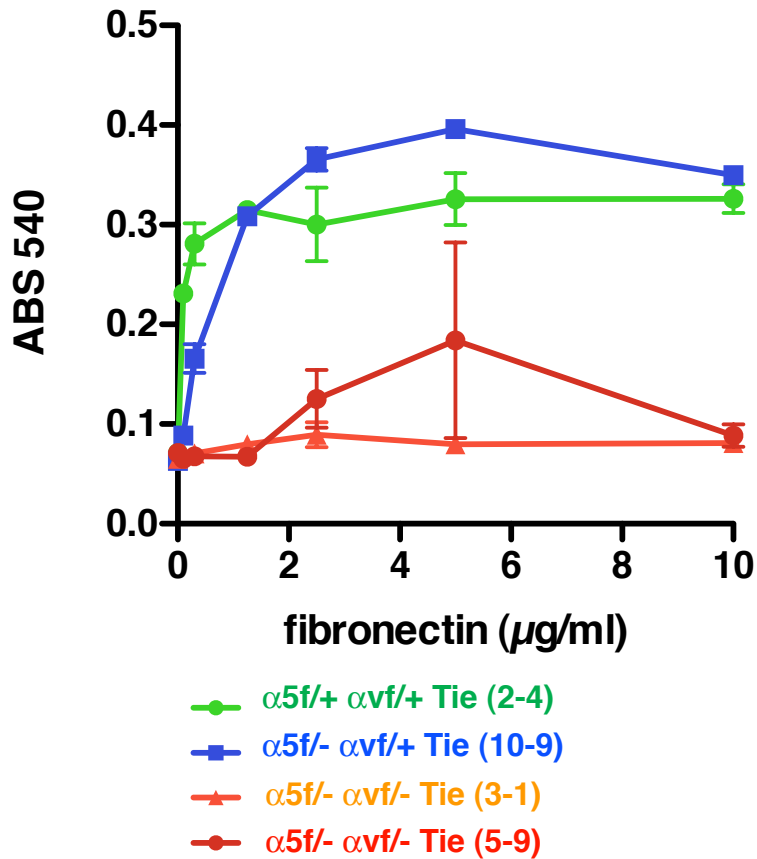

Supplement: dev049551-sup-049551figs9.pdf [file dev049551-sup-049551figs9.pdf]
